# Supplementary material
Source: Springer Nature journal article supplement (https://www.springermedizin.de/resource/supplementary/12885_2011_2817_MOESM2_ESM.pdf/9462088)

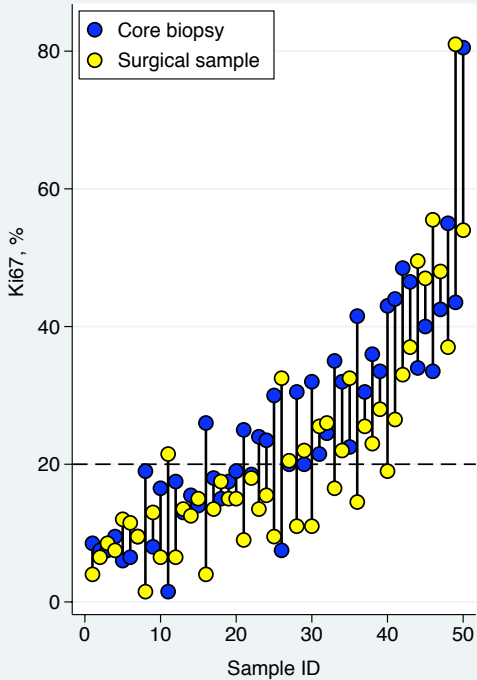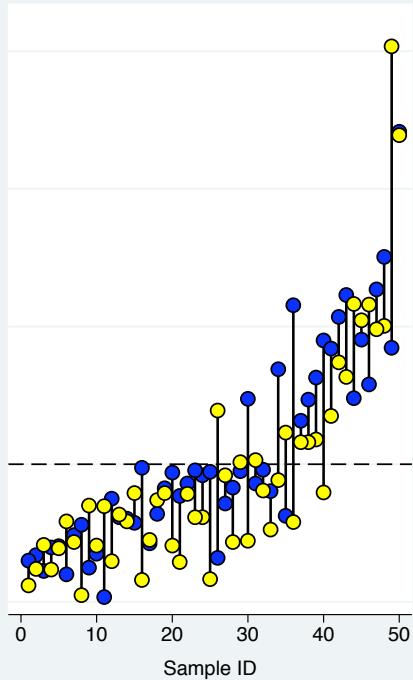

Supplement: MOESM2 [file 9462088]
